# Supplementary material
Source: Springer Nature journal article supplement (https://www.springermedizin.de/resource/supplementary/12936_2007_370_MOESM1_ESM.pdf/9547656)
Supplement: MOESM1 [file 9547656]

**695 screened**

399 not malaria  
9 non-falciparum malaria

**287 randomised**

**Day 0**

42 CQ

39 AQ

40 SP

83 AQ+SP

83 AQ+AS

**287**

|                          |   |   |   |   |   |   |
|--------------------------|---|---|---|---|---|---|
| Withdrawn consent        | 0 | 1 | 2 | 0 | 1 | 4 |
| Excluded                 | 1 |   |   |   |   | 1 |
| Did not attend follow-up | 2 | 0 | 0 | 2 | 2 | 6 |

**Evaluable by Day 14**

39

38

38

81

80

**276**

|                          |   |   |   |   |   |    |
|--------------------------|---|---|---|---|---|----|
| Withdrawn consent        | 0 | 0 | 0 | 0 | 0 | 0  |
| Did not attend follow-up | 3 | 2 | 0 | 2 | 4 | 11 |

**Evaluable by Day 28**

36

36

38

79

76

**265**
